# Supplementary material
Source: publisher figshare collection journal article supplement (https://acs.figshare.com/ndownloader/files/5794542)
Supplement: Supplementary file 1 [file 5794542]

#### Terms & Conditions

Electronic Supporting Information files are available without a subscription to ACS Web Editions. The American Chemical Society holds a copyright ownership interest in any copyrightable Supporting Information. Files available from the ACS website may be downloaded for personal use only. Users are not otherwise permitted to reproduce, republish, redistribute, or sell any Supporting Information from the ACS website, either in whole or in part, in either machine-readable form or any other form without permission from the American Chemical Society. For permission to reproduce, republish and redistribute this material, requesters must process their own requests via the RightsLink permission system. Information about how to use the RightsLink permission system can be found at <http://pubs.acs.org/page/copyright/permissions.html>

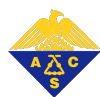

ACS Publications

MOST TRUSTED. MOST CITED. MOST READ.

Copyright © 1996 American Chemical Society

## Supplementary Material

### General Experimental Conditions

All reactions were carried out in flame-dried glassware under an inert atmosphere (nitrogen or argon), unless stated otherwise. Temperatures indicated refer to an external bath. All reactions were magnetically stirred.

All organic solvents were distilled and dried following known procedures.<sup>1</sup> All aldehydes were either distilled or chromatographed on SiO<sub>2</sub> prior to use. Other commercial reagents were purchased from Aldrich Chemicals (Milwaukee) and used without further purification.

Analytical thin layer chromatography (TLC) was performed using Merck silica gel 60 F254 precoated glass plates (0.25 mm). Visualization was effected by short wave UV illumination, KMnO<sub>4</sub> dip or phosphomolybdic acid/ethanol solution followed by development on a hot plate. Flash chromatography was performed according to the procedure of Still<sup>2</sup> using Merck silica gel (230-400 mesh).

Melting points were measured on a Gallenkamp melting point apparatus and temperatures are reported in °C and are uncorrected. Infrared spectra were recorded on a Perkin-Elmer 727B Infrared Spectrometer and are reported in wavenumbers (cm<sup>-1</sup>) and were run in CHCl<sub>3</sub> unless stated otherwise. All <sup>1</sup>H nuclear magnetic resonance (NMR) spectra were recorded on a Varian XL200 (200 MHz) or Varian Unity-400 (400 MHz) spectrometer. Unless indicated otherwise, all spectra were obtained in CDCl<sub>3</sub> (Me<sub>4</sub>Si internal standard) with chemical shifts reported in ppm and coupling constants in Hz. Low and high resolution mass spectra were measured on a Kratos MS50TC mass spectrometer.

---

<sup>1</sup> Perrin, D.D. and Armarego, W.L.F.; *Purification of Laboratory Chemicals*, 3rd. Ed.; Pergamon Press: Toronto, 1988.

<sup>2</sup> Still, W.C.; Kahn, M.; Mitra, A. *J. Org. Chem.* 1978, 43, 2923.

**General procedure for generating benzyltrimethylammonium 2-proposed.**

Methoxide (35 wt. % solution in methanol, 2.33 g, 4.5 mmol) and 2-propanol (100 ml) were placed in a 250 ml three necked round bottom flask. The flask was then connected to an oil vacuum pump, the volatile solvents were removed to dryness, and the residue was then dissolved in 15 to 25 ml of the *tert*-butyl alcohol. An aliquot (1 ml) of the resultant solution was taken and benzoyl chloride (29  $\mu$ l, 0.25 mmol) was added and stirred for 15 minutes. This aliquot was then washed with water and dried over  $\text{MgSO}_4$ . Removal of the solvent under vacuo afforded the crude 2-propyl benzoate. The  $^1\text{H}$  NMR spectrum of the crude benzoate was taken using methanol as an internal standard, to determine the molarity of the solution.

**General procedure for alkylations of various aldehydes bearing only one  $\alpha$ -proton using benzyltrimethylammonium 2-propoxide.**

Freshly prepared benzyltrimethylammonium 2-propoxide (1.2-1.4 mmol) in 10 ml of *tert*-butyl alcohol was put in a 25 ml round bottom flask. The appropriate aldehydes (1mmol) and alkyl halides (3 mmol) were dissolved in 2 ml of *tert*-butyl alcohol and added to the solution of 2-propoxide in one portion. The mixture was stirred for 30 minutes, unless indicated otherwise, at ambient temperature. Progress was monitored by TLC, and by  $^1\text{H}$  NMR spectra of an aliquot to ensure the complete consumption of starting material. The precipitated salt was filtered, and the filtrate was added to a solution of 2,4-dinitrophenyl hydrazine in ethanol containing a catalytic amount of concentrated sulfuric acid. Following stirring for 30 minutes, the hydrazone was dissolved in methylene chloride and washed with water, dried over  $\text{MgSO}_4$ , filtered and solvent evaporated in vacuo. The crude product was purified by  $\text{SiO}_2$  chromatography using hexane:ethyl acetate (17:1) as eluent.

**(1-benzyl-1-cyclohexanecarboxaldehyde)-2,4-dinitrophenyl hydrazone 3:**

Prepared following the above procedure from cyclohexanecarboxaldehyde **1** and benzyl bromide in 100% yield.

<sup>1</sup>H NMR : 1.41-1.68 (m, 8H), 1.91-1.97 (m, 2H), 2.8 (s, 2H), 7.04-7.09 (m, 2H), 7.2-7.28 (m, 3H), 7.29 (s, 1H), 7.78 (d, 1H, J=9.6), 8.27 (dd, 1H, J=9.5, 2.5), 9.12 (d, J=2.5), 10.99 (s, 1H).

<sup>13</sup>C NMR : 22.5 (2C), 25.9 (1C), 34.3 (2C), 42.9 (1C), 47.7 (1C), 116.6 (1C), 123.4 (1C), 126.4 (1C), 127.9 (2C), 128.7 (1C), 129.9 (1C), 130.5 (2C), 136.7 (1C), 137.7 (1C), 145.2 (1C), 158.4 (1C).

IR : 3300 (m), 2920 (m), 1620 (s), 1590 (s), 1330 (s).

HREIMS: m<sup>+</sup>/z: calc. : 382.1642, found: 382.1639

M.P.: 162.5° - 163.5°C

**(1-Allyl-1-cyclohexanecarboxaldehyde)-2,4-dinitrophenyl hydrazone 4:**

Prepared following the above procedure from cyclohexanecarboxaldehyde **1** and allyl bromide in 98% yield.

<sup>1</sup>H NMR : 1.43-1.60 (m, 8H), 1.83-1.9 (m, 2H), 2.28 (d, 2H, J=7.3), 5.04 (d, 1H, J=4.7), 5.1 (s, 1H), 5.67-5.83 (m, 1H), 7.34 (s, 1H), 7.91 (d, 1H, J=9.6), 8.31 (dd, 1H, J=9.5, 2.5), 9.2 (d, 1H, J=2.5), 10.98 (s, 1H).

<sup>13</sup>C NMR : 22.2 (2C), 25.9 (1C), 33.9 (2C), 41.8 (1C), 44.2 (1C), 116.6 (1C), 118.2 (1C), 123.4 (1C), 128.7 (1C), 129.9 (1C), 133.3 (1C), 137.7 (1C), 145.2 (1C), 158.4 (1C).

IR: 3300 (m), 2920 (m), 1615 (s), 1590 (s), 1330 (s).

HREIMS: m<sup>+</sup>/z: calc. : 332.1486, found: 332.1462

M.P.: 155.3° - 156.4°C

**(1-Crotyl-1-cyclohexanecarboxaldehyde)-2,4-dinitrophenyl hydrazone 5:**

Prepared following the above procedure from cyclohexanecarboxaldehyde **1** and crotyl bromide in 98% yield.

<sup>1</sup>H NMR : 1.33-1.67 (m, 11H), 1.80-1.87 (m, 2H), 2.17-2.23 (m, 2H), 5.40-5.46 (m, 2H), 7.33 (s, 1H), 7.92 (d, 1H, J=9.7), 8.31 (dd, 1H, J=9.7, 2.6), 9.13 (d, 1H, J=2.6), 10.99 (s, 1H).

<sup>13</sup>C NMR : 18.0 (1C), 22.2 (2C), 25.9 (1C), 33.9 (2C), 42.0 (1C), 116.6 (2C), 123.5 (2C), 125.5 (1C), 128.7 (1C), 129.9 (2C), 145.3 (1C), 158.8 (1C).

IR: 3300 (m), 2920 (m), 1615 (s), 1590 (s), 1330 (s).

HREIMS: m<sup>+</sup>/z: calc. : 346.1642, found: 346.1649.

M.P.: 139.5° - 141°C

**(1-Methyl-1-cyclohexanecarboxaldehyde)-2,4-dinitrophenyl hydrazone 6:**

Prepared following the above procedure from cyclohexanecarboxaldehyde **1** and methyl iodide in 92% yield.

<sup>1</sup>H NMR: 1.16 (s, 3H), 1.37-1.56 (m, 8H), 1.76-1.85 (m, 2H), 7.4 (s, 1H), 7.92 (d, 1H, J=9.6), 8.31 (dd, 1H, J=9.7, 2.5), 9.13 (d, 1H, J=2.5), 10.97 (s, 1H).

<sup>13</sup>C NMR: 22.2 (2C), 25.8 (2C), 35.8 (2C), 38.7 (1C), 116.5 (1C), 123.5 (1C), 128.7 (1C), 129.9 (1C), 137.6 (1C), 145.3 (1C), 159.6 (1C).

IR : 3300 (m), 2920 (m), 1625 (s), 1590 (s), 1335 (s).

HREIMS: m<sup>+</sup>/z: calc. : 306.1329, found: 306.1318.

M.P.: 157.9° - 159.6°C

**(1-Ethyl-1-cyclohexanecarboxaldehyde)-2,4-dinitrophenyl hydrazone 7:**

Prepared following the above procedure from cyclohexanecarboxaldehyde **1** and ethyl iodide in 82% yield.

<sup>1</sup>H NMR : 0.85 (t, 3H, J=7.4), 1.35-1.60 (m, 10H), 1.83-1.89 (m, 2H), 7.29 (s, 1H), 7.92 (d, 1H, J=9.5), 8.31 (dd, 1H, J=9.7, 2.5), 9.13 (d, 1H, J=2.5), 10.99 (s, 1H).

<sup>13</sup>C NMR : 14.0 (1C), 22.3 (2C), 23.3 (1C), 25.7 (1C), 34.1 (2C), 41.8 (1C), 116.6 (1C), 123.5 (1C), 128.7 (1C), 129.9 (1C), 137.6 (1C), 145.3 (1C), 159.0 (1C).

IR : 3300 (m), 2920 (m), 1615 (s), 1590 (s), 1335 (s).

HREIMS: m<sup>+</sup>/z: calc. : 320.1486, found: 320.1458.

M.P.: 153.6° - 155°C

**(1-Butyl-1-cyclohexanecarboxaldehyde)-2,4-dinitrophenyl hydrazone 8:**

Prepared following the above procedure from cyclohexanecarboxaldehyde **1** and butyl iodide in 80% yield.

<sup>1</sup>H NMR : 0.89 (t, 3H, J=7), 1.2-1.58 (m, 14H), 1.83-1.88 (m, 2H) 7.3 (s, 1H), 7.92 (d, 1H, J=9.6), 8.3 (dd, 1H, J=9.7, 2.5), 9.13 (d, 1H, J=2.5), 11.01 (s, 1H).

<sup>13</sup>C NMR : 13.9 (1C), 22.3 (2C), 23.4 (1C), 25.7 (1C), 26.1 (1C), 34.2 (2C), 39.8 (1C), 41.8 (1C), 116.6 (1C), 123.5 (1C), 128.7 (1C), 129.9 (1C), 137.6 (1C), 145.3 (1C), 159.0 (1C).

IR : 3300 (m), 2920 (m), 1615 (s), 1590 (s), 1335 (s).

HREIMS: m<sup>+</sup>/z: calc. : 348.1799, found: 348.1795.

M.P.: 164.4° - 165.5°C.

**(1-Isopropyl-1-cyclohexanecarboxaldehyde)-2,4-dinitrophenyl hydrazone 9:**

Prepared following the above procedure from cyclohexanecarboxaldehyde **1** and isopropyl iodide in 72% yield.

<sup>1</sup>H NMR : 0.92 (d, 6H, J=6.8), 1.37-1.42 (m, 4H), 1.62-1.70 (m, 5H), 1.97-2.0 (m, 2H), 7.29 (s, 1H), 7.93 (d, 1H, J=9.5), 8.29 (dd, 1H, J=9.5, 2.5), 9.14 (d, 1H, J=2.5), 11.04 (s, 1H).

<sup>13</sup>C NMR : 17.3 (2C), 22.6 (2C), 26.0 (1C), 31.9 (2C), 36.9 (1C), 44.5 (1C), 116.6 (1C), 123.5 (1C), 128.7 (1C), 130.0 (1C), 137.6 (1C), 145.3 (1C), 157.8 (1C).

IR : 3300 (m), 2920 (m), 1615 (s), 1590 (s), 1335 (s).

HREIMS: m<sup>+</sup>/z: calc. : 334.1642, found: 334.1652.

M.P.: 154° - 156.2° C.

**Trimethyl-acetaldehyde-2,4-dinitrophenyl hydrazone :**

Prepared following the above procedure from isobutyraldehyde **10** and methyl iodide in 96% yield.

<sup>1</sup>H NMR : 1.22 (s, 9H), 7.44 (s, 1H), 7.93 (d, 1H, J=9.6), 8.28 (dd, 1H, J=9.6, 2.6), 9.12 (d, 1H, J=2.6), 10.94 (s, 1H).

<sup>13</sup>C NMR : 27.3 (3C), 35.5 (1C), 116.5 (1C), 125.5 (1C), 128.5 (1C), 129.8 (1C), 137.6 (1C), 145.3 (1C), 159.7 (1C).

IR : 3300 (m), 2920 (m), 1615 (s), 1590 (s), 1335 (s).

HREIMS: m<sup>+</sup>/z: calc. : 266.1016, found: 266.1014.

M.P.: 205.1° - 205.4°C

**(1-Methyl-1-cyclopentanecarboxaldehyde)-2,4-dinitrophenyl hydrazone :**

Prepared following the above procedure from cyclopentanecarboxaldehyde **11** and methyl iodide in 92% yield.

<sup>1</sup>H NMR : 1.27 (s, 3H), 1.52-1.94 (m, 8H), 7.48 (s, 1H), 7.93 (d, 1H, J=9.6), 8.28 (dd, 1H, J=9.6, 2.5), 9.12 (d, 1H, J=2.5), 10.97 (s, 1H).

<sup>13</sup>C NMR : 24.1 (1C), 24.6 (2C), 37.8 (2C), 46.6 (1C), 116.5 (1C), 123.5 (1C), 128.7 (1C), 129.9 (1C), 137.6 (1C), 145.3 (1C), 159.3 (1C).

IR : 3300 (m), 2920 (m), 1615 (s), 1590 (s), 1330 (s).

HREIMS: m<sup>+</sup>/z: calc. : 292.1172, found: 292.1124.

M.P.: 149.4° - 150.6°C

**(1-Methyl-myrtanal)-2,4-dinitrophenyl hydrazone 13:**

Prepared following the above procedure from myrtanal **12** and methyl iodide. The reaction was stirred for 12 hours to produce the corresponding hydrazone of C-methylated myrtanal in 60% yield.

<sup>1</sup>H NMR : 0.86 (s, 3H), 1.25 (s, 3H), 1.37 (s, 3H), 1.52 (d, 1H, J=9), 2.2-2.51 (m, 3H), 5.75 (dd, 1H, J=9, 1.8), 6.3 (q, 1H, J=6.45), 7.53 (s, 1H), 7.93 (d, 1H, J=9.6), 8.31 (dd, 1H, J=9.6, 2.5), 9.12 (d, 1H, J=2.5), 11.04 (s, 1H).

<sup>13</sup>C NMR : 24.7 (1C), 25.9 (1C), 27.2 (1C), 31.2 (1C), 42.0 (1C), 42.4 (1C), 46.9 (1C), 50.8 (1C), 116.4 (1C), 123.5 (1C), 127.9 (1C), 128.8 (1C), 129.9 (1C), 136.8 (1C), 137.7 (1C), 145.2 (1C), 158.2 (1C).

IR : 3300 (m), 2920 (m), 1615 (s), 1590 (s), 1330 (s).

HREIMS: m<sup>+</sup>/z: calc. : 344.1486, found: 344.1478.

M.P.: 205.2° - 206.7°C.



**8-Formyl-2,4,8-trimethylbicyclo[3.2.1]octan-3-one 16:**

Prepared following the above procedure from aldehyde **15** and methyl iodide. The reaction was stirred for 2 hours to give the ketoaldehyde **16** in 71% yield.

<sup>1</sup>H NMR : 1.05 (d, 6H, J=6.8), 1.21 (s, 3H), 2.62-2.75 (m, 4H), 6.13 (d, 2H, J=1.3), 9.95 (s, 1H).

<sup>13</sup>C NMR : 13.9 (2C), 23.6 (1C), 46.7 (2C), 52.4 (2C), 56.6 (1C), 134.4 (2C), 160.1 (1C), 181.9 (1C).

IR: 1700 (s)

HREIMS: m<sup>+</sup>/z : calc. (for C<sub>11</sub>H<sub>15</sub>O): 163.1123, found: 163.1057
